# Supplementary material for: Selective sweeps on novel and introgressed variation shape mimicry loci in a butterfly adaptive radiation
Source: PLOS journal article supplement (doi:10.1371/journal.pbio.3000597), 2020-02-06
Supplement: S31 (10.1371/journal.pbio.3000597.s031) [file journal.pbio.3000597.s031]

**S9 Table. List of additional genes with significant colour pattern associations on the cortex scaffold from Nadeau *et al.* [30] that overlap with or are in proximity of selection signatures detected in this study.**

| Hm gene IDs | He gene IDs                                                      | Putative gene name                           | Position relative to cortex | Comment                                                        | Number ID in S17 Fig and S18 Fig |
|-------------|------------------------------------------------------------------|----------------------------------------------|-----------------------------|----------------------------------------------------------------|----------------------------------|
| HM00002     | HERA000036                                                       | Acylpeptide hydrolase                        | downstream                  |                                                                | 6                                |
| HM00008     | HERA000040                                                       |                                              | downstream                  |                                                                | 7                                |
| HM00012     | HERA000042                                                       | <i>CG2519</i>                                | downstream                  |                                                                | 8                                |
| HM00019     | HERA000052                                                       | <i>BmSuc2</i>                                | downstream                  |                                                                | 9                                |
| HM00026     | HERA000077                                                       | Poly-A specific ribonuclease <i>parn</i>     | upstream                    |                                                                | 14                               |
| HM00031     | HERA000083                                                       |                                              | upstream                    |                                                                | 15                               |
| HM00032     | HERA000084                                                       | Zinc phosphodiesterase                       | upstream                    |                                                                | 16                               |
| HM00033     | HERA000085                                                       | Serine/threonine-protein kinase <i>LMTK1</i> | upstream                    | strong, consistent selection signal in <i>H. melpomene</i>     | 17                               |
| HM00034     | HERA000086                                                       | WD repeat domain <i>Wdr13</i>                | upstream                    |                                                                | 18                               |
| HM00035     | HERA000087                                                       | <i>domeless</i>                              | upstream                    | truncated sequence                                             | 19/10                            |
| HM00036     | HERA000061                                                       | <i>washout / WAS homologue 1</i>             | upstream                    | strong evidence in Nadeau <i>et al.</i> 2016                   | 20/11                            |
| HM00037     | annotated as evm.TU.Herato1505.96 in <i>H. erato demophon v1</i> | <i>domeless</i>                              | upstream                    | complete sequence, not considered in Nadeau <i>et al.</i> 2016 | 21/12                            |
| HM00038     | HERA000062                                                       | <i>lethal (2) k05819 CG3054</i>              | upstream                    | strong, consistent selection signal in <i>H. erato</i>         | 22/13                            |
| HM00052     | HERA000076                                                       |                                              | upstream                    |                                                                | 23                               |
